# Supplementary material for: A cilia-inspired micropatterned sensor with a high-permittivity dielectric hydrogel for ultrasensitive mechanoreception both in air and underwater
Source: Royal Society of Chemistry journal article supplement (doi:10.1039/d3ta05884k), 2023-01-01
Supplement: d3ta05884k1.pdf [file d3ta05884k1.pdf]

## Supporting Information

### A cilia-inspired micropatterned sensor with a high-permittivity dielectric hydrogel for ultrasensitive mechanoreception both in air and underwater

Yuanyuan Wang, Jiaqi Liao, Chencong Liu, Qingfeng Sun\*, Julia L. Shamshina\*, Xiaoping Shen\*

Y. Wang, J. Liao, C. Liu, Q. Sun, X. Shen

College of Chemistry and Materials Engineering

Zhejiang A&F University

Hangzhou 311300, China

J. L. Shamshina

Fiber and Biopolymer Research Institute

Department of Plant and Soil Science

Texas Tech University

Lubbock, TX 79409, USA

E-mail: [qfsun@zafu.edu.cn](mailto:qfsun@zafu.edu.cn); [jshamshi@ttu.edu](mailto:jshamshi@ttu.edu), [xpshen@zafu.edu.cn](mailto:xpshen@zafu.edu.cn)

## Content:

|                                                                                                                                                                       |    |
|-----------------------------------------------------------------------------------------------------------------------------------------------------------------------|----|
| Fig. S1. Preparation of Ni-CH on a nickel foam using a custom-made mold.                                                                                              | S3 |
| Fig. S2. SEM image of the surface of Ni-CH.                                                                                                                           | S3 |
| Fig. S3. SEM image captured from a lateral perspective of the Ni-CH on a nickel foam.                                                                                 | S4 |
| Fig. S4. Ni elemental mapping on the surface of Ni-CH.                                                                                                                | S4 |
| Fig. S5. Water content of Ni-CH measured at room temperature (ranging within 25-30 °C) and room humidity (ranging within 40-80%).                                     | S5 |
| Fig. S6. Tensile stress-strain curves of Ni-CH and pure PAAc hydrogels.                                                                                               | S5 |
| Fig. S7. Picture of the large-area hybrid conductive membrane.                                                                                                        | S6 |
| Fig. S8. SEM image of the CF electrode after cycling tests.                                                                                                           | S6 |
| Fig. S9. Temperature and humidity recording inside a mask during respiration monitoring.                                                                              | S7 |
| Fig. S10. The custom water wave generation system.                                                                                                                    | S7 |
| Fig. S11. The test setup of a hydrophone.                                                                                                                             | S8 |
| Fig. S12. Circuit for the signal transformation from capacitance to voltage. MIC for the capacitance input, UCC for the power supply (4.5 V), OUT for voltage output. | S8 |
| Fig. S13 Dependence of acoustic wave detection voltage of the cilia-inspired sensor on the acoustic wave intensity with a sweep frequency method (20-20k Hz)          | S9 |

|                                                                     |     |
|---------------------------------------------------------------------|-----|
| Calculation of sound sensitivity (S)                                | S9  |
| Calculation of sound pressure                                       | S9  |
| Table. S1. Comparison of sensitivity based on micro mechanosensors. | S10 |
| Supporting References                                               | S11 |

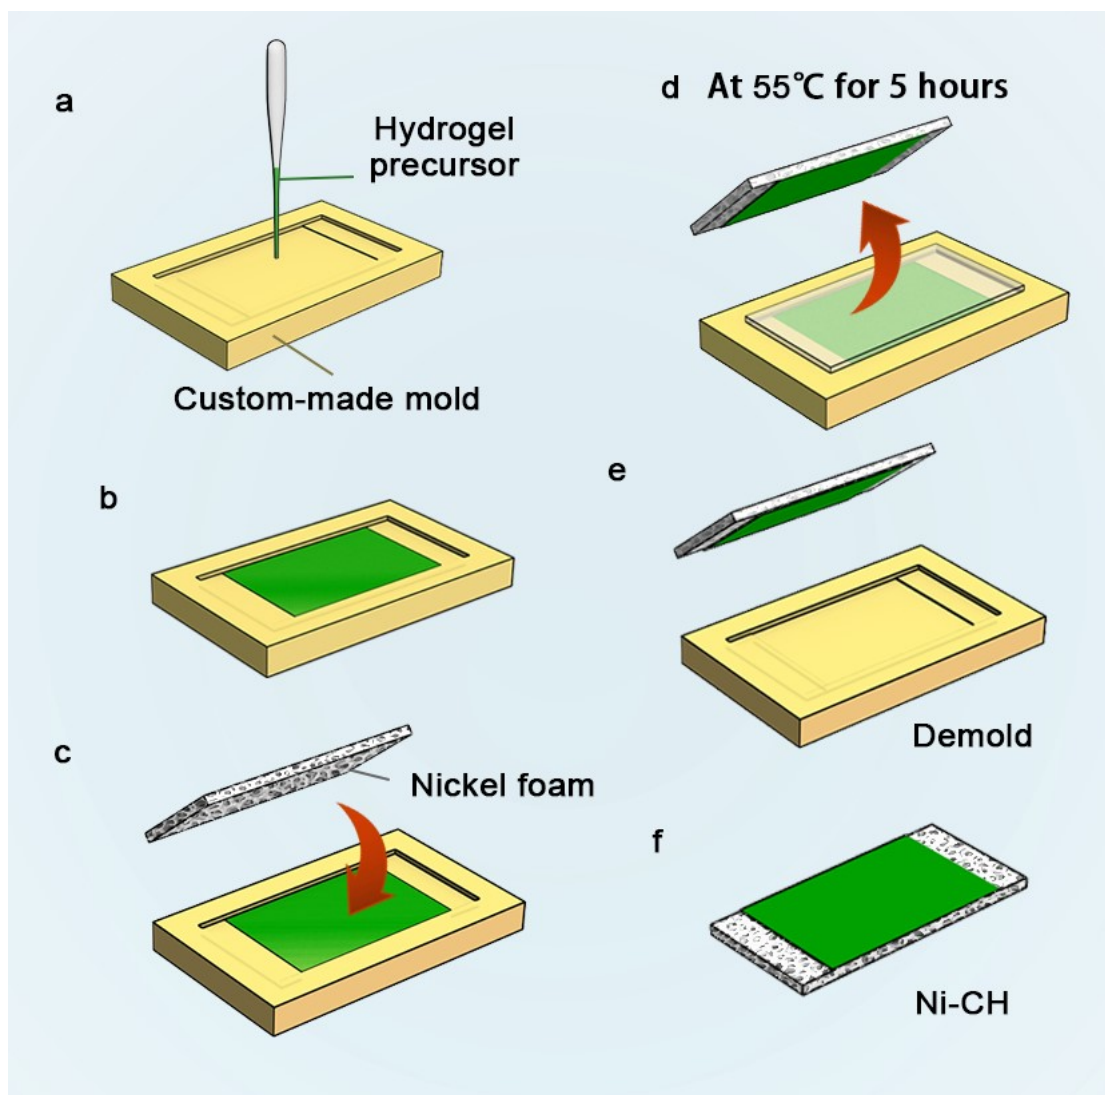

**Fig. S1.** Preparation of Ni-CH on a nickel foam using a custom-made mold.

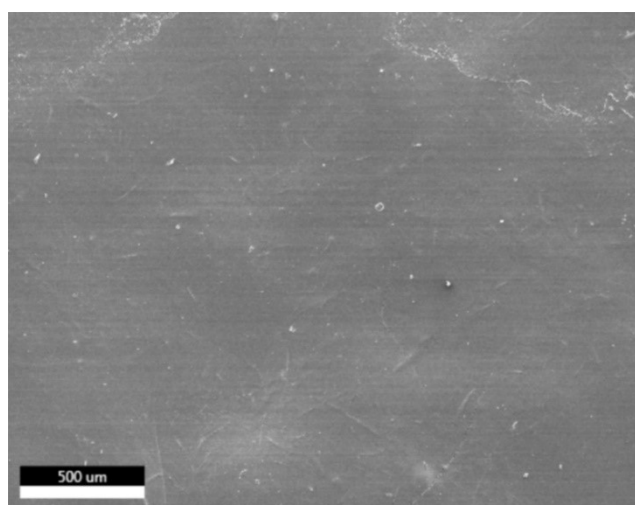

**Fig. S2.** SEM image of the surface of Ni-CH.

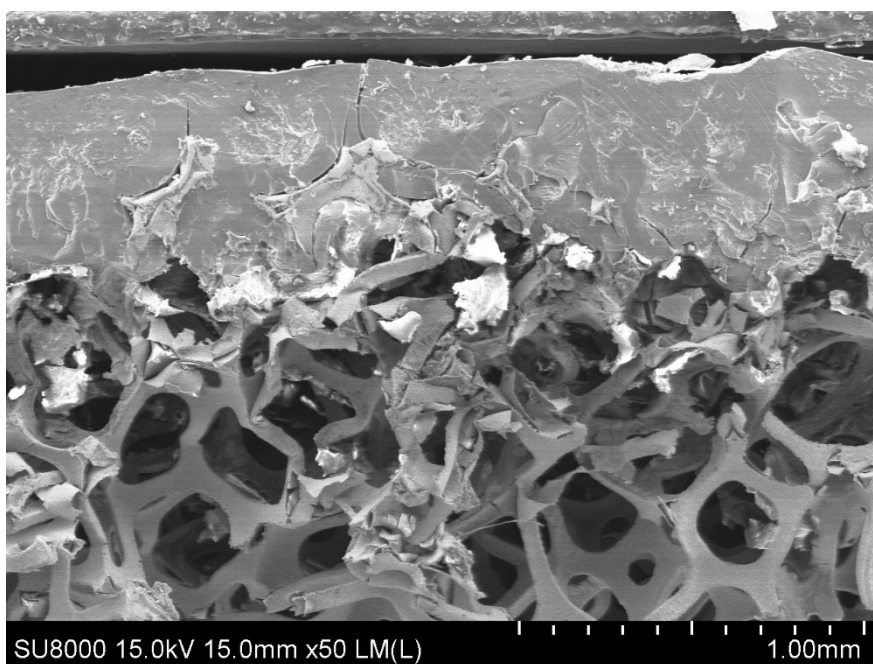

**Fig. S3.** SEM image captured from a lateral perspective of the Ni-CH on a nickel foam.

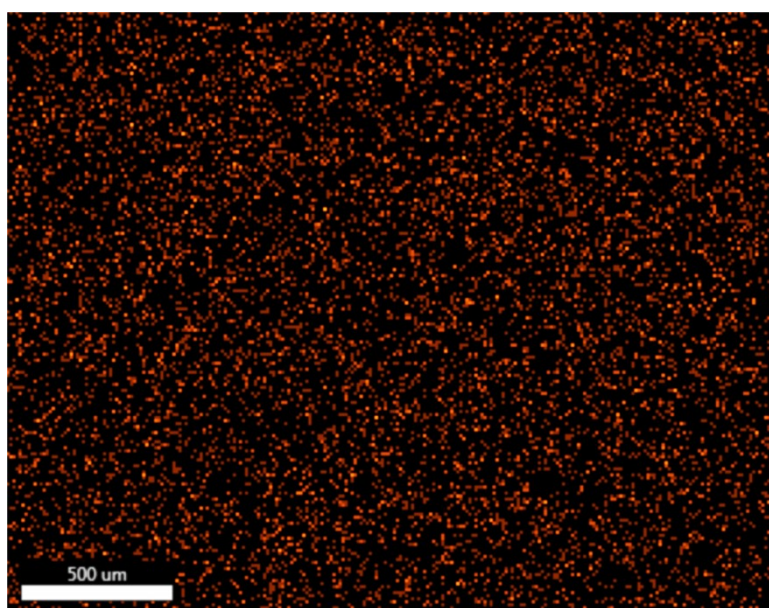

**Fig. S4.** Ni elemental mapping on the surface of Ni-CH.

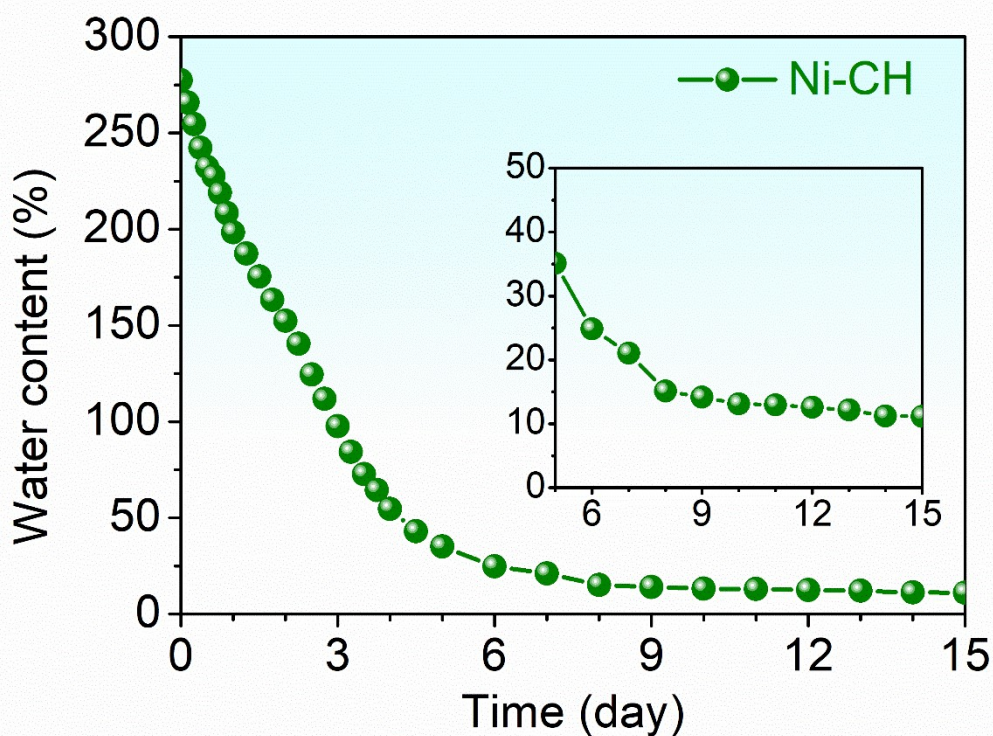

Fig. S5. Water content of Ni-CH measured at room temperature (ranging within 25-30 °C) and room humidity (ranging within 40-80%).

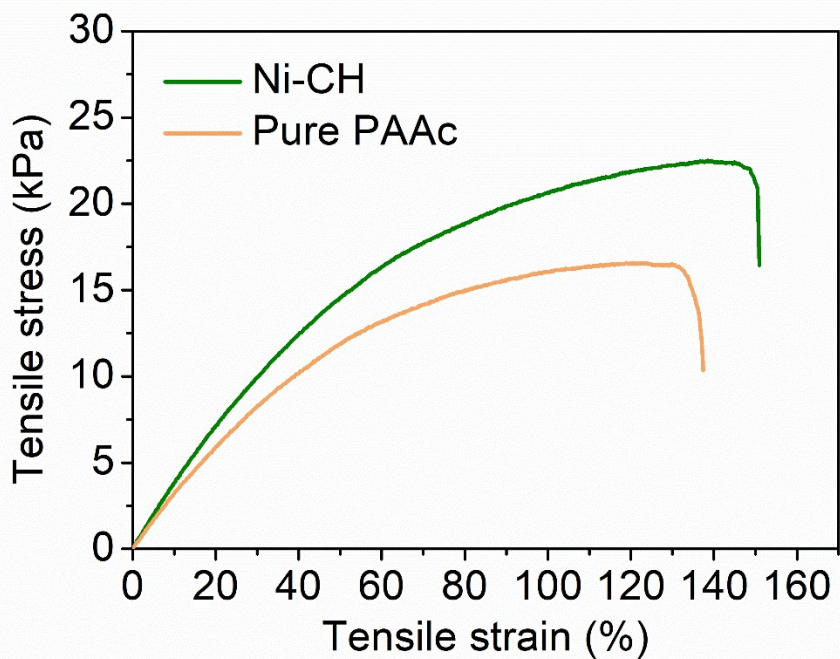

Fig. S6. Tensile stress-strain curves of Ni-CH and pure PAAc hydrogels.

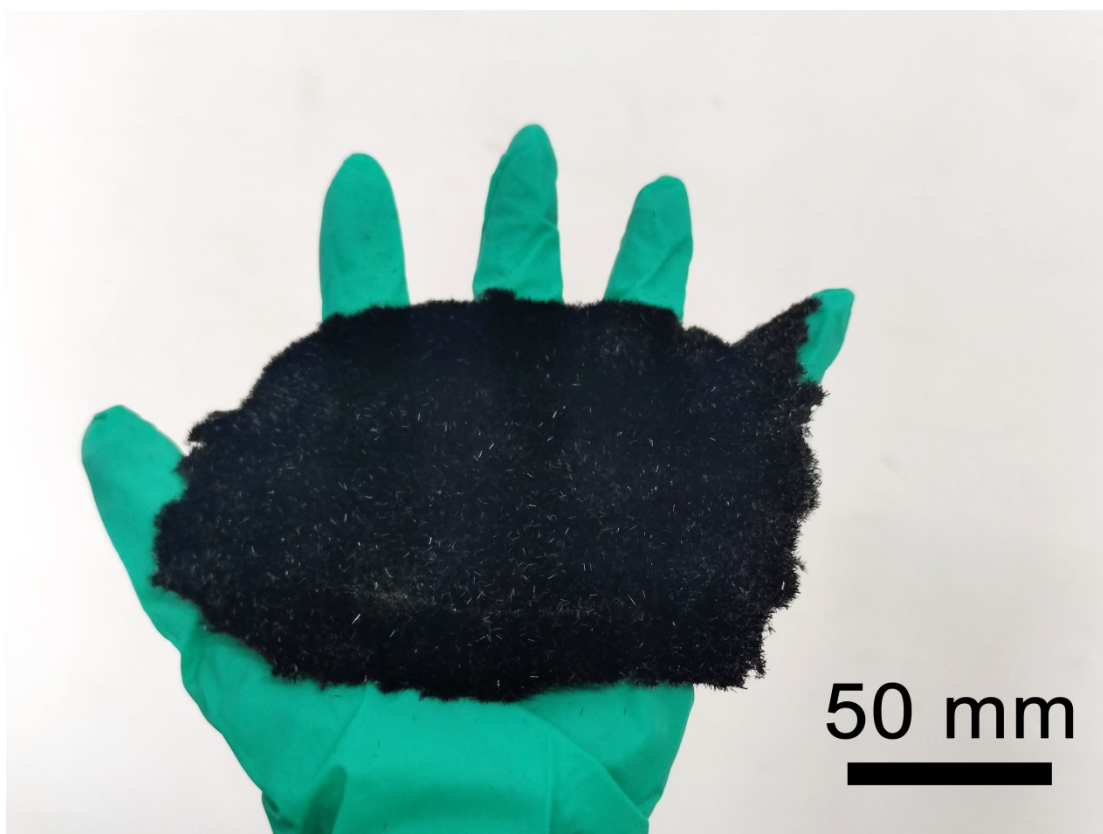

**Fig. S7.** Picture of the large-area hybrid conductive membrane.

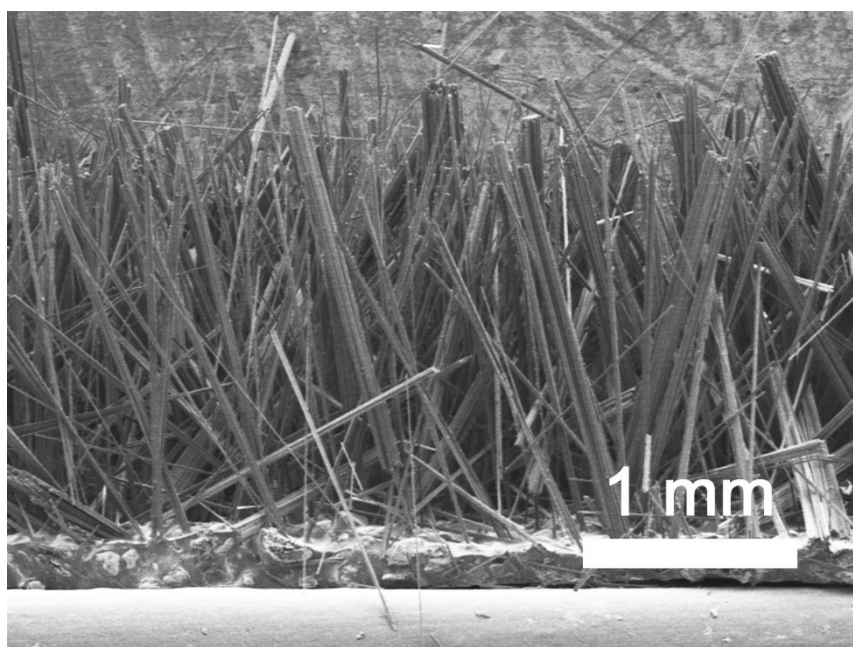

**Fig. S8.** SEM image of the CF electrode after cycling tests.

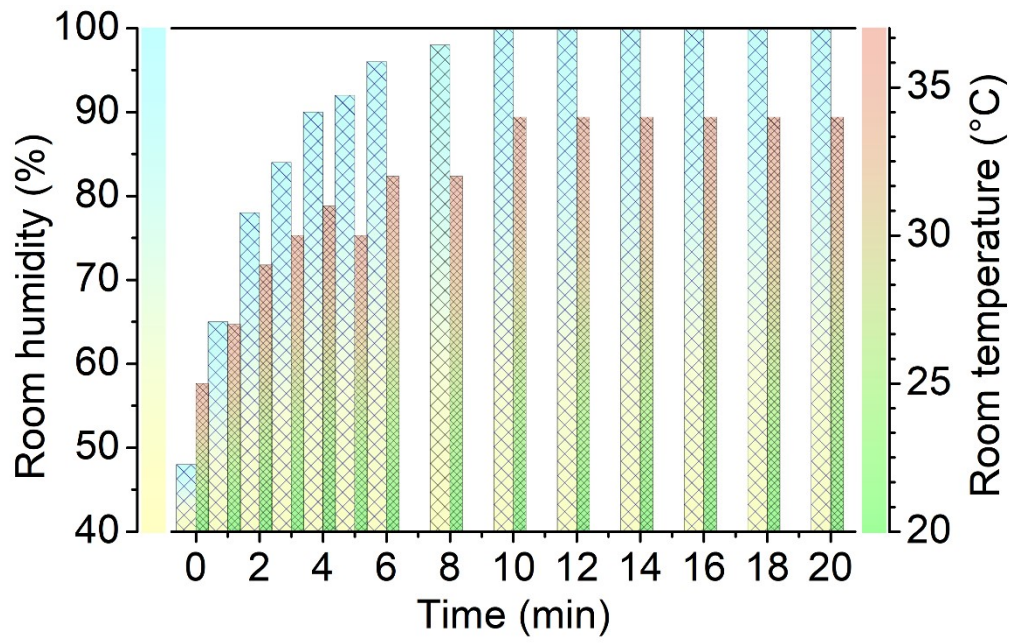

**Fig. S9.** Temperature and humidity recording inside a mask during respiration monitoring.

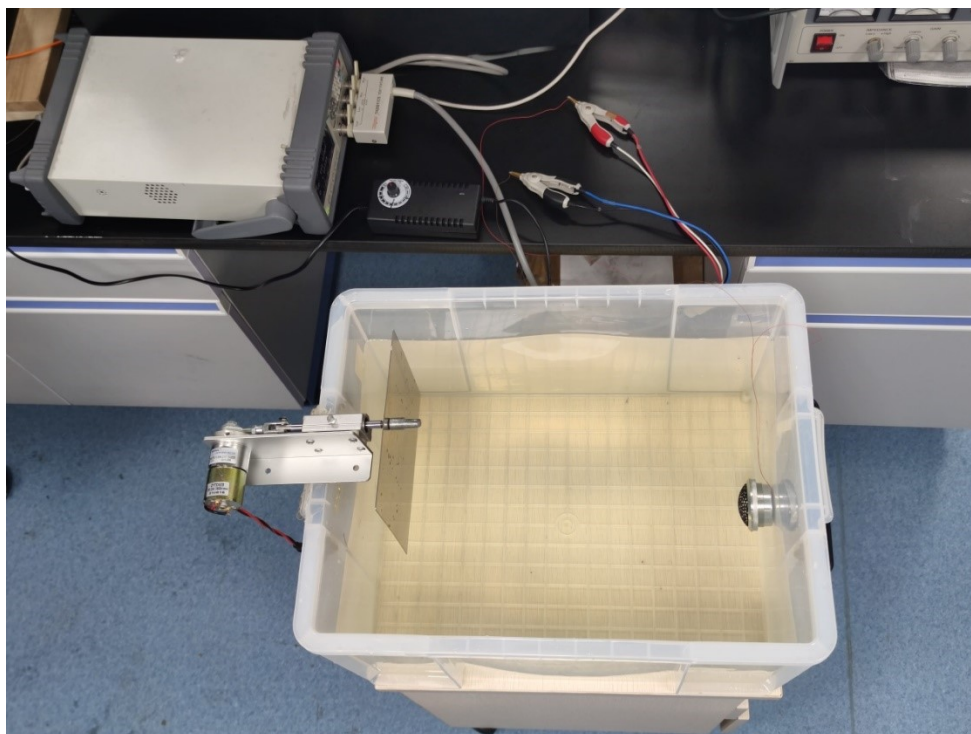

**Fig. S10.** The custom water wave generation system.

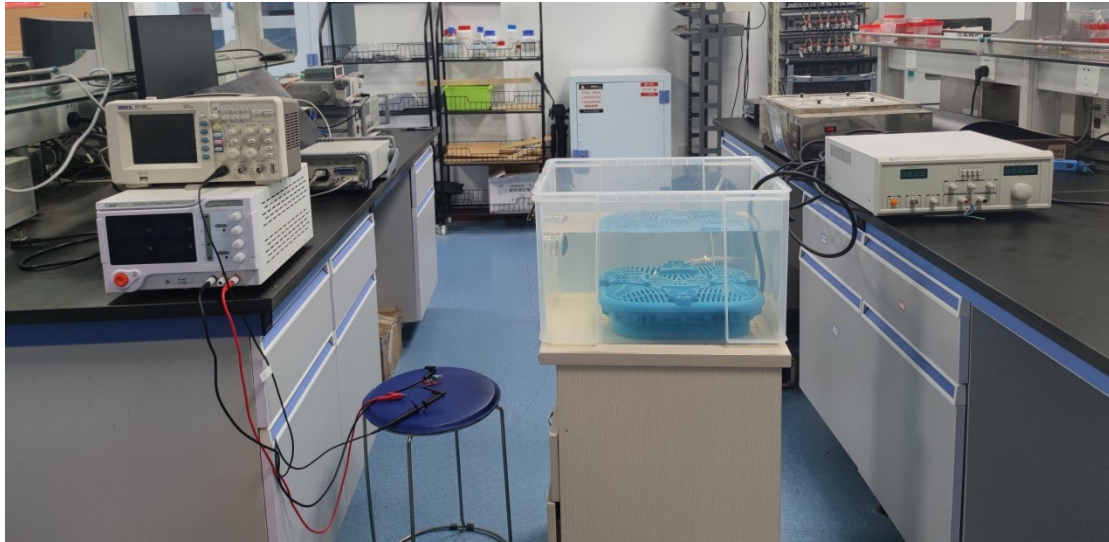

**Fig. S11.** The test setup of a hydrophone.

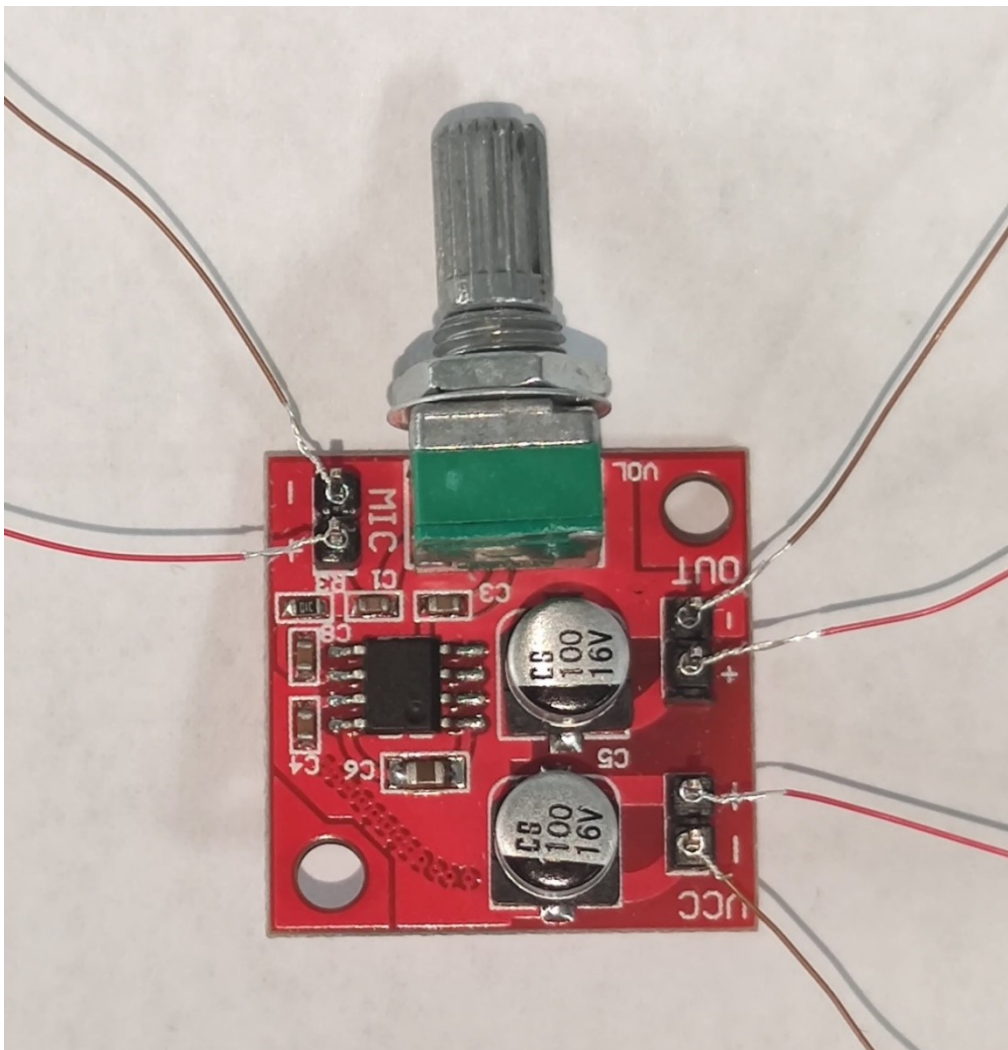

**Fig. S12.** Circuit for the signal transformation from capacitance to voltage. MIC for the capacitance input, UCC for the power supply (4.5 V), OUT for voltage output.



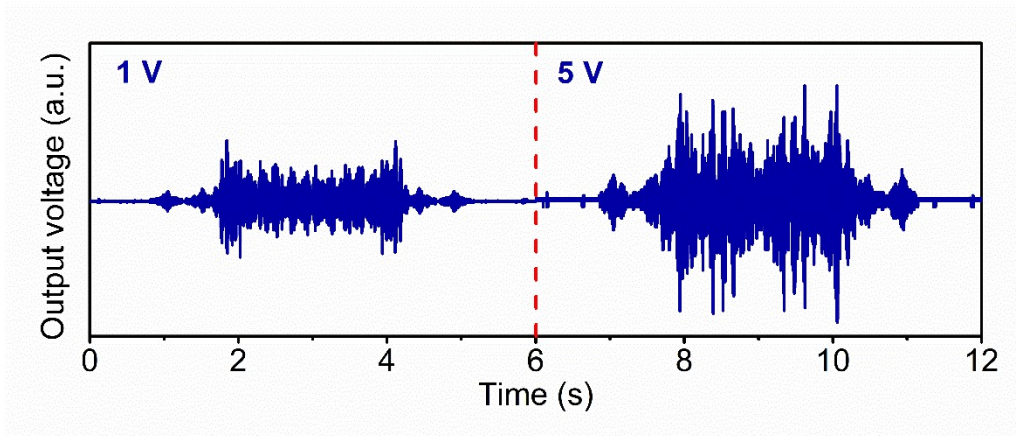

**Fig. S13.** Dependence of acoustic wave detection voltage of the cilia-inspired sensor on the acoustic wave intensity with a sweep frequency method (20-20k Hz).

### Calculation of sound sensitivity (S)

If the voltage signal of hydrophone is  $10^{-3.5}\text{V}$  under a sound pressure of  $1\text{Pa}$ , then the sensitivity is:

$$10^{-3.5} \text{ V} / 1 \text{ Pa} = 10^{-3.5}\text{V/Pa}.$$

The S can be further defined as:

$$S = 20 \times \lg[(10^{-3.5}\text{V/Pa}) / (1 \text{ V}/\mu\text{Pa})] = 20 \times \lg(10^{-9.5}) = -190 \text{ dB}$$

### Calculation of sound pressure

Firstly, the environmental noise is determined when no extra sound generator was used.

After FFT analyses of the voltage output, the voltage spectra for the surrounding noise is obtained. If the voltage at 2 kHz is  $2 \times 10^{-2} \text{ V}$ , then the surrounding noise at 2 kHz is  $20 \times \lg(20^{-2}) = -34 \text{ dB}$ .

If the S value of the hydrophone is  $-192 \text{ dB}$ , then the sound pressure level (SPL) is  $-34 - (-192) = 158 \text{ dB}$ .

**Table. S1.** Sensitivity comparison of hydrogel-based mechanosensors.

| Entry     | Dielectric layer (wood-based)/<br>Transfer media                                                                                                                                 | Electrode                                               | Working mode                    | Sensitivity, kPa <sup>-1</sup> | Ref.      |
|-----------|----------------------------------------------------------------------------------------------------------------------------------------------------------------------------------|---------------------------------------------------------|---------------------------------|--------------------------------|-----------|
| 1         | Elastic ionic polyacrylamide hydrogel (EIPH)                                                                                                                                     | Indium-tin oxide electrode                              | Microcapacitive mechanosensors  | 2.33                           | [S1]      |
| 2         | TA@ HAP NWs/AlCl <sub>3</sub> /PVA /ethylene glycol (EG)/water                                                                                                                   | NR                                                      | Ionic conductive strain sensors | GF = 2.84                      | [S2]      |
| 3         | TOCNF/PVA/borax/CaCl <sub>2</sub>                                                                                                                                                | PVA hydrogel                                            | Microcapacitive mechanosensors  | 0.75                           | [S3]      |
| 4         | A polyacrylamidehydrogel containing NaCl as the ionic conductor/acrylicelastomer (VHB)                                                                                           | Electrical double Layer                                 | Ionic conductive sensors        | 1                              | [S4]      |
| 5         | CNT forest elastic electrodes and intermediate elastic insulating layer                                                                                                          | vCNT electrode                                          | Microcapacitive mechanosensors  | 56.5                           | [S5]      |
| 6         | A poly-(dimethylsiloxane) (PDMS) dielectric layer structure with tilted micropillar arrays                                                                                       | Au electrode                                            | Microcapacitive mechanosensors  | 0.42                           | [S6]      |
| 7         | Colorless polyimide (CPI)                                                                                                                                                        | Top AgNWs electrode and micropatterned bottom electrode | Microcapacitive mechanosensors  | 1.2                            | [S7]      |
| 8         | C/ECH/NaCl                                                                                                                                                                       | Copper foil                                             | Microcapacitive mechanosensors  | 0.6                            | [S8]      |
| This work | Amphibious dielectric hydrogel (Ni-CH) (conducting direct thermally-induced radical polymerization of PAAc in the presence of cellulose nanofibers (CNFs) on a thin nickel foam) | Carbon fiber electrode                                  | Microcapacitive mechanosensors  | 182                            | This work |

## References

- S1 M. J. Yin, Z. G. Yin, Y. X. Zhang, Q. D. Zheng and A. P. Zhang, *Nano Energy*, 2019, 58, 96-104.
- S2 X. Jing, H. Li, H. Y. Mi, Y. J. Liu, P. Y. Feng, Y. M. Tan and L. S. Turng, *SENSOR ACTUAT B-CHEM*, 2019, 295, 159-167.
- S3 X. Jing, H. Li, H.-Y. Mi, Y.-J. Liu, P.-Y. Feng, Y.-M. Tan and L.-S. Turng, *SENSOR ACTUAT B-CHEM*, 2019, 295, 159-167.
- S4 J. Y. Sun, C. Keplinger, G. M. Whitesides and Z. Suo, *Adv. Mater.*, 2014, 26, 7608-7614.
- S5 U. H. Shin, D. W. Jeong, S. M. Park, S. H. Kim, H. W. Lee and J. M. Kim, *CARBON*, 2014, 80, 396-404.
- S6 Y. Luo, J. Shao, S. Chen, X. Chen, H. Tian, X. Li, L. Wang, D. Wang and B. Lu, *ACS Appl. Mater. Interfaces*, 2019, 11, 17796-17803.
- S7 Y. Wan, Z. Qiu, Y. Hong, Y. Wang, J. Zhang, Q. Liu, Z. Wu and C. F. Guo, *Adv. Electron. Mater.*, 2018, 4, 1700586.
- S8 X. Shen, D. Zhao, Y. Xie, Q. Wang, J. L. Shamshina, R. D. Rogers and Q. Sun, *Adv. Funct. Mater.*, 2023, 33, 2214317.
